# Supplementary material for: Combined analysis of genome-wide expression and copy number profiles to identify key altered genomic regions in cancer
Source: PubMed Central journal article supplement (PMC3476997; doi:10.1186/1471-2164-13-s5-s5), 2012-10-19

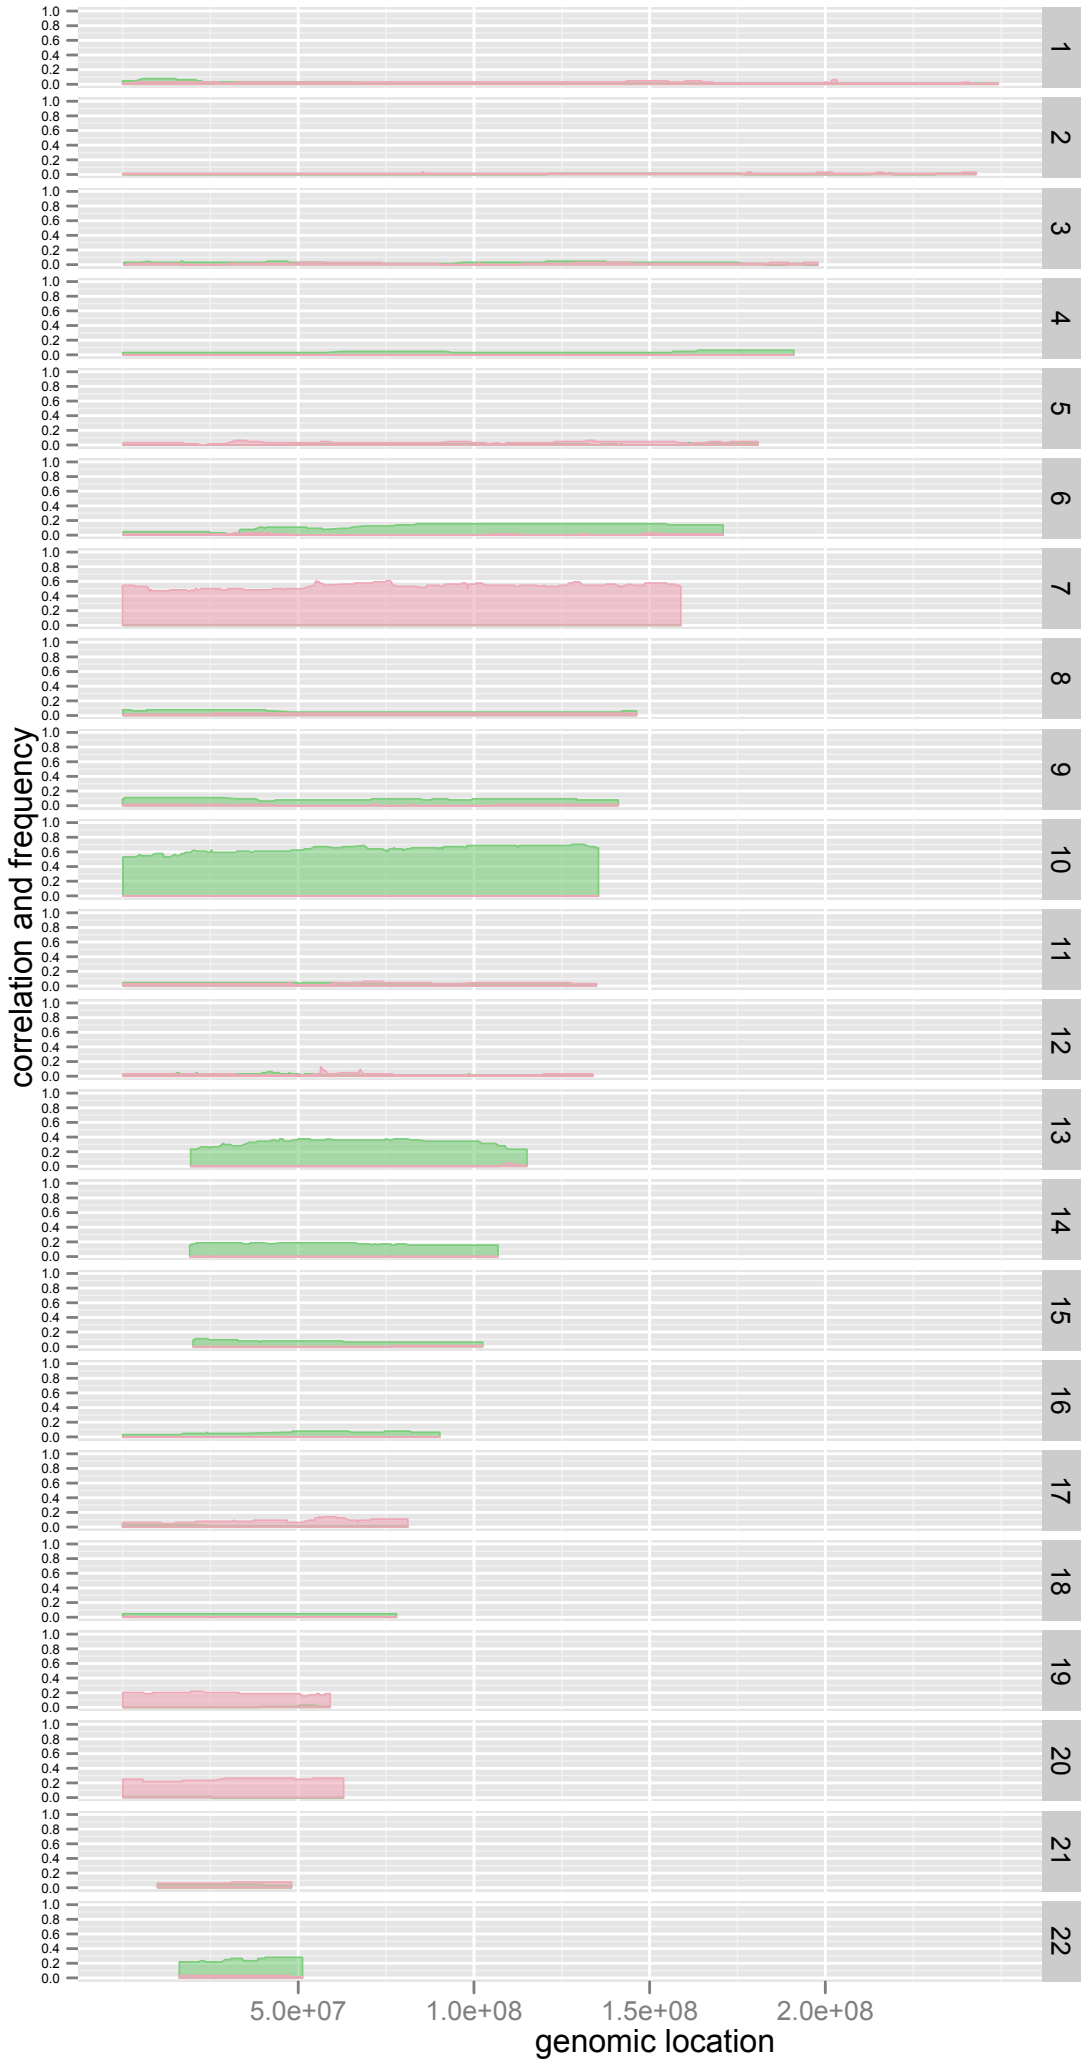

Supplement: 1471-2164-13-S5-S5-S3.pdf [file 1471-2164-13-S5-S5-S3.pdf]
